# Supplementary material for: Temporal integration on the dendrites of fast-spiking basket cells
Source: Research Square preprint supplement (doi:10.21203/rs.3.rs-4272725/v1), 2024-04-23
Supplement: Supplementary file 1 [file 614b31a81a8b1c382cb27ad0.docx]

**Temporal integration on the dendrites of fast-spiking basket cells**

Ming Liu, Xiaojuan Sun

School of Science, Beijing University of Posts and Telecommunications, Beijing, 100876, China

**Supplementary Information**

**Supplementary Methods**

**1 Equations of all biophysical mechanisms**

**Fast sodium channel** (Durstewitz & Gabriel54)

, C is the temperature

**Delayed rectifier potassium channel** (Durstewitz & Gabriel54)

**Fast calcium dependent potassium channel** (Shao et al.55)

The channel has three states: active (O), non active (C) and inactivated (I). The transition from C to O is calcium dependent. The transition from O to I is voltage dependent and is responsible for the presence of the fast afterhyperpolarization potential. The transition from I to C is voltage dependent and slow as well.

where is the internal calcium concentration.

**Slow calcium dependent potassium channel** (Poirazi et al. 56)

where is the internal calcium concentration and as for N-type calcium current.

**A-type potassium channel** (Poirazi et al. 56)

**Slow inactivating potassium channel** (Durstewitz & Seamans57)

**Hyperpolarization activated current** (Poirazi et al. 56)

**T-type calcium channel** (Poirazi et al. 56)

**N-type calcium channel** (Poirazi et al. 56)

**L-type calcium channel** (Poirazi et al. 56)

**Calcium buffering** (Poirazi et al. 56)

**Calcium permeable AMPA receptor** (Destexhe et al. 58)

where

**NMDA receptor** (Destexhe et al. 58)

where

**2 Properties of biophysical models**

**Supplementary Table S1. Passsive properties of compartmental model. Dendrites distance from soma less than 100m are defined as proximal dendrites, otherwise as distal dendrites.**

|  | soma | axon | proximal dendrites | distal dendrites |
| --- | --- | --- | --- | --- |
| Leak conductance ()59 | 1.135 | 3.55 | 1.315 | 1.34 |
| Resting membrane potential() 59,60 | -68 | -68 | -68 | -68 |
| Membrane potential () 59 | 1.2 | 1.2 | 1.2 | 1.2 |
| Axial resistance () 59 | 172 | 172 | 142 | 142 |

**Supplementary Table S2. Ionic channel conductance across each compartments in neuron.**

| Ion channel () | soma | axon | proximal dendrites | distal dendrites |
| --- | --- | --- | --- | --- |
| 48, 61 | 0.396 | 1.296 | 0.018 | 0.0141 |
| 48 | 0.00001 |  |  |  |
| 48, 61 | 0.0432 | 0.144 | 0.0009 | 0.009 |
| 48 | 0.000725 |  |  |  |
| 48 | 0.0001 |  |  |  |
| 48 | 0.02 |  |  |  |
| (proximal) 48, 62 | 0.0032 |  | 0.00064 |  |
| (distal) 48, 62 |  |  |  | 0.0018 |
| 48 |  |  | 0.00003 | 0.00003 |
| 48 |  |  | 0.00003 | 0.00003 |
| 48 |  |  | 0.0002 | 0.0002 |
| Calcium buffering dynamics48 | P |  | P | P |

**Supplementary Table S3. Synaptic conductance weight of Calcium-permeable AMPA and NMDA.**

| synapses | conductance weight |
| --- | --- |
| Calcium-permeable AMPA51, 59 | 7.5 |
| NMDA52 | 3.25 |

**Supplementary Table S4. Number of supralinear and sublinear dendrites in compartmental model. The number of compartments with an average diameter greater than 1.2m is recorded as wrong.**

| nonlinearity | number of dendrites |
| --- | --- |
| supralinear | 151 |
| sublinear | 17 |
| wrong | 49 |

**3 Model validation**

**Supplementary Figure S1.** **(A)** Current injection. A depolarizing current(0.5nA) and a hyperpolarizing current(-0.3nA) injection in soma. **(B)** Somatic firing responses after current injection in A.

**Supplementary Results**

**Supplementary Figure S2.** **(A)** Schematic illustration of the selected supralinear dendritic branch 76. **(B)** Mean somatic input-output relationships for the temporal input patterns to the chosen dendrite.

**Supplementary References**

54. Durstewitz, D., & Gabriel, T. Dynamical basis of irregular spiking in NMDA-driven prefrontal cortex neurons. *Cerebral cortex*, **17**, 894-908 (2007).

55. Shao, L. R., Halvorsrud, R., Borg-Graham, L., & Storm, J. F. The role of BK-type Ca2+-dependent K+ channels in spike broadening during repetitive firing in rat hippocampal pyramidal cells. *The Journal of Physiology*, **521**(Pt 1), 135 (1999).

56. Poirazi, P., Brannon, T., & Mel, B. W. Pyramidal neuron as two-layer neural network. *Neuron*, **37**, 989-999 (2003).

57. Durstewitz, D., & Seamans, J. K. The computational role of dopamine D1 receptors in working memory. *Neural Networks*, **15**, 561-572 (2002).

58. Destexhe, A., Mainen, Z. F., & Sejnowski, T. J. Synthesis of models for excitable membranes, synaptic transmission and neuromodulation using a common kinetic formalism. *Journal of computational neuroscience*, **1**, 195-230 (1994).

59. Nörenberg, A., Hu, H., Vida, I., Bartos, M., & Jonas, P. Distinct nonuniform cable properties optimize rapid and efficient activation of fast-spiking GABAergic interneurons. *Proceedings of the National Academy of Sciences,* **107**, 894-899 (2010).

60. Bacci, A., Rudolph, U., Huguenard, J. R., & Prince, D. A. Major differences in inhibitory synaptic transmission onto two neocortical interneuron subclasses. *Journal of Neuroscience*, **23**, 9664-9674 (2003).

61. Hu, H., Gan, J., & Jonas, P. Fast-spiking, parvalbumin+ GABAergic interneurons: From cellular design to microcircuit function. *Science*, **345**, 1255263 (2014).

62. Goldberg, J. H., Yuste, R., & Tamas, G. Ca2+ imaging of mouse neocortical interneurone dendrites: contribution of Ca2+‐permeable AMPA and NMDA receptors to subthreshold Ca2+ dynamics. *The Journal of Physiology*, **551**, 67-78 (2003).
